# Supplementary material for: Non-alcoholic fatty liver disease increases risk of carotid atherosclerosis and ischemic stroke: An updated meta-analysis with 135,602 individuals
Source: PubMed Central journal article supplement — Clin Mol Hepatol. 2022 Mar 2;28(3):483–96. doi: 10.3350/cmh.2021.0406 (PMC9293613; doi:10.3350/cmh.2021.0406), 2022-03-02
Supplement: cmh-2021-0406-suppl1.pdf [file cmh-2021-0406-suppl1.pdf]

**Supplementary Material 1.** Search strategy

1. 'nonalcoholic fatty liver'/exp
2. nafld:ti,ab OR nash:ti,ab OR (((liver\* OR hepat\*) NEAR/3 (fatty OR steato\* OR steatohepat\* OR fibrosis)):ti,ab)
3. #1 OR #2
4. 'hemorrhagic stroke'/exp OR 'ischemic stroke'/exp
5. stroke\*:ti,ab OR (((brain OR 'intra cranial' OR intracranial) NEAR/3 (bleed\* OR hemorrhage\* OR infart\*)):ti,ab)
6. #4 AND #5
7. 'carotid intima-media thickness'/exp OR 'carotid intima':ti,ab OR cimt:ti,ab
8. 'carotid intima\*':ti,ab OR cimt\*:ti,ab
9. #7 OR #8
10. #6 OR #9
11. #3 AND #10
12. #11 AND [english]/lim
13. #12 AND [article]/lim
