# Supplementary material for: Non-alcoholic fatty liver disease increases risk of carotid atherosclerosis and ischemic stroke: An updated meta-analysis with 135,602 individuals
Source: PubMed Central journal article supplement — Clin Mol Hepatol. 2022 Mar 2;28(3):483–96. doi: 10.3350/cmh.2021.0406 (PMC9293613; doi:10.3350/cmh.2021.0406), 2022-03-02
Supplement: cmh-2021-0406-suppl2.pdf [file cmh-2021-0406-suppl2.pdf]

**Supplementary Table 1.** Summary of included articles

| Study                                       | Country     | Study duration | Diagnosis method    | Sample size |        |         | Age (years) |         | Gender male (%) |         | Quality assessment |
|---------------------------------------------|-------------|----------------|---------------------|-------------|--------|---------|-------------|---------|-----------------|---------|--------------------|
|                                             |             |                |                     | Total       | NAFLD  | Control | NAFLD       | Control | NAFLD           | Control |                    |
| Mori et al. <sup>68</sup> (2022)            | Japan       | 2016–2019      | Ultrasound          | 676         | 267    | 409     | 67.00       | 70.67   | 68.90           | 59.90   | 8                  |
| Taharbout et al. <sup>31</sup> (2021)       | Algeria     | 2010–2016      | Ultrasound          | 426         | 213    | 213     | 48.50       | 48.50   | 90.60           | 96.70   | 8                  |
| Wang et al. <sup>36</sup> (2021)            | China       | 2010–2016      | Ultrasound          | 8,451       | 2,557  | 5,894   | 57.80       | 57.90   | 31.80           | 31.40   | 9                  |
| Xu et al. <sup>37</sup> (2021)              | China       | 2006–2016      | Ultrasound          | 79,905      | 24,874 | 55,031  | 52.14       | 50.75   | 77.80           | 74.30   | 9                  |
| Assem et al. <sup>41</sup> (2021)           | Egypt       | 2020–2020      | Ultrasound          | 100         | 50     | 50      | 53.00       | 54.00   | 45.00           | 45.00   | 8                  |
| Omar et al. <sup>69</sup> (2020)            | Malaysia    | 2015–2016      | Ultrasound          | 150         | 107    | 43      | 59.00       | 57.00   | 77.00           | 74.00   | 8                  |
| Rampally et al. <sup>47</sup> (2020)        | India       | 2020–2020      | Ultrasound          | 90          | 45     | 45      | 44.87       | -       | 57.80           | 62.20   | 7                  |
| Kemaloglu and Kemalolu <sup>89</sup> (2019) | Turkey      | 2010–2011      | Ultrasound          | 153         | 103    | 50      | 48.92       | 45.86   | 37.90           | 30.00   | 8                  |
| Mohammadzadeh et al. <sup>56</sup> (2019)   | Iran        | 2014–2016      | Ultrasound          | 300         | 150    | 150     | 49.90       | 52.50   | 65.30           | 57.30   | 8                  |
| Oni et al. <sup>94</sup> (2019)             | USA         | 2000–2002      | Computed tomography | 4,123       | 729    | 3,394   | 61.00       | 63.00   | 47.00           | 44.00   | 8                  |
| Tu et al. <sup>35</sup> (2019)              | China       | 2010–2016      | Ultrasound          | 128         | 34     | 94      | 62.40       | 63.60   | 76.50           | 68.10   | 7                  |
| Zheng et al. <sup>39</sup> (2018)           | China       | 2010–2011      | Ultrasound          | 4,112       | 1,571  | 2,541   | 56.20       | 55.60   | 64.40           | 35.60   | 8                  |
| Fadaei et al. <sup>50</sup> (2019)          | Iran        | 2018–2018      | Ultrasound          | 82          | 49     | 33      | 50.67       | 52.00   | -               | -       | 8                  |
| Tan et al. <sup>70</sup> (2018)             | Malaysia    | 2015–2016      | Ultrasound          | 251         | 144    | 107     | 49.10       | 44.40   | 84.00           | 60.70   | 7                  |
| Cetindagli et al. <sup>86</sup> (2017)      | Turkey      | 2015–2015      | Biopsy & Ultrasound | 130         | 93     | 37      | 34.49       | 33.76   | 92.50           | 91.50   | 8                  |
| Gill et al. <sup>93</sup> (2017)            | USA         | 2004–2007      | Ultrasound          | 407         | 208    | 199     | 49.63       | 50.36   | 31.70           | 33.20   | 7                  |
| Li et al. <sup>5</sup> (2018)               | China       | 2014–2016      | Ultrasound          | 1,007       | 320    | 687     | 54.20       | 54.00   | 0.00            | 0.00    | 8                  |
| Rasool et al. <sup>48</sup> (2017)          | India       | 2017–2017      | Ultrasound          | 300         | 200    | 100     | 42.30       | 41.38   | 43.00           | 40.00   | 8                  |
| Serra-Planas et al. <sup>79</sup> (2017)    | Spain       | 2010–2012      | Ultrasound          | 100         | 12     | 88      | 43.30       | 38.90   | 66.70           | 52.30   | 8                  |
| Guo et al. <sup>32</sup> (2017)             | China       | 2005–2014      | Ultrasound          | 8,571       | 4,340  | 4,231   | 57.40       | 61.90   | 54.60           | 55.90   | 8                  |
| Fracanzani et al. <sup>59</sup> (2016)      | Spain       | 2002–2014      | Ultrasound          | 273         | 91     | 182     | 61.00       | 62.00   | -               | -       | 9                  |
| Stolic et al. <sup>72</sup> (2016)          | Serbia      | 2016–2016      | Ultrasound          | 72          | 37     | 35      | -           | -       | 51.40           | 62.90   | 8                  |
| Zhang et al. <sup>38</sup> (2016)           | China       | 2005–2014      | Ultrasound          | 722         | 123    | 599     | 47.40       | 46.00   | 52.80           | 51.10   | 8                  |
| Mantovani et al. <sup>60</sup> (2016)       | Italy       | 1999–2001      | Ultrasound          | 286         | 150    | 136     | 47.50       | 38.80   | 48.00           | 36.00   | 9                  |
| Hong et al. <sup>73</sup> (2016)            | South Korea | 2012–2013      | Ultrasound          | 955         | 342    | 613     | 52.33       | 50.33   | 48.80           | 42.10   | 8                  |
| Hanafi et al. <sup>51</sup> (2015)          | Iran        | 2015–2015      | Ultrasound          | 85          | 30     | 55      | -           | -       | 53.30           | 45.50   | 8                  |
| Moon et al. <sup>78</sup> (2015)            | South Korea | 2009–2009      | Ultrasound          | 755         | 382    | 373     | 51.80       | 51.70   | 100.00          | 100.00  | 7                  |
| Ozturk et al. <sup>92</sup> (2015)          | Turkey      | 2013–2014      | Biopsy              | 102         | 61     | 41      | 32.74       | 31.80   | 100.00          | 100.00  | 8                  |

Supplementary Table 1. Continue

| Study                                    | Country     | Study duration | Diagnosis method | Sample size |       | Age (years) |       | Gender male (%) |        | Quality assessment |         |
|------------------------------------------|-------------|----------------|------------------|-------------|-------|-------------|-------|-----------------|--------|--------------------|---------|
|                                          |             |                |                  | Total       | NAFLD | Control     | NAFLD | Control         | NAFLD  |                    | Control |
| Silaghi et al. <sup>71</sup> (2015)      | Romania     | 2013–2014      | Ultrasound       | 336         | 289   | 47          | 55.70 | 59.60           | -      | -                  | 7       |
| Ayaz et al. <sup>83</sup> (2014)         | Turkey      | 2014–2014      | Ultrasound       | 90          | 60    | 30          | 44.50 | 40.00           | 36.70  | 26.70              | 8       |
| Kim et al. <sup>77</sup> (2014)          | South Korea | 2014–2014      | Ultrasound       | 4,437       | 3,226 | 1,211       | 58.08 | 57.33           | 47.20  | 41.30              | 7       |
| Mikolasevic et al. <sup>40</sup> (2014)  | Croatia     | 2014–2014      | Ultrasound       | 71          | 38    | 33          | 56.70 | 54.70           | 44.70  | 36.40              | 8       |
| Nahandi et al. <sup>57</sup> (2014)      | Iran        | 2008–2010      | Ultrasound       | 151         | 99    | 52          | 46.67 | 43.10           | 33.30  | 40.20              | 8       |
| Arinc et al. <sup>82</sup> (2013)        | Turkey      | 2010–2012      | Biopsy           | 80          | 50    | 30          | 42.00 | 41.00           | 54.00  | 63.30              | 8       |
| Lankarani et al. <sup>52</sup> (2013)    | Iran        | 2013–2013      | Ultrasound       | 580         | 290   | 290         | 46.40 | 45.40           | 44.80  | 60.00              | 8       |
| Tziomalos et al. <sup>43</sup> (2013)    | Greece      | 2010–2012      | Ultrasound       | 415         | 32    | 383         | 77.40 | 78.80           | 40.00  | 37.10              | 7       |
| ElAzeem et al. <sup>42</sup> (2013)      | Egypt       | 2009–2010      | Ultrasound       | 747         | 268   | 479         | 52.10 | 51.11           | 49.60  | 48.60              | 8       |
| Mishra et al. <sup>46</sup> (2013)       | India       | 2012–2012      | Ultrasound       | 645         | 101   | 544         | 31.60 | 27.10           | 100.00 | 100.00             | 7       |
| Başar et al. <sup>85</sup> (2013)        | Turkey      | 2012–2012      | Ultrasound       | 69          | 34    | 35          | 42.10 | 41.30           | 33.30  | 39.40              | 7       |
| Colak et al. <sup>87</sup> (2012)        | Turkey      | 2012–2012      | Ultrasound       | 72          | 51    | 21          | 42.81 | 40.50           | 51.00  | 52.40              | 8       |
| Kucukazman et al. <sup>91</sup> (2013)   | Turkey      | 2012–2012      | Ultrasound       | 161         | 117   | 44          | 45.80 | 45.40           | 44.40  | 31.80              | 8       |
| Colak et al. <sup>87</sup> (2012)        | Turkey      | 2012–2012      | Biopsy           | 87          | 57    | 30          | 44.20 | 42.70           | 45.60  | 46.70              | 8       |
| Huang et al. <sup>33</sup> (2012)        | China       | 2010–2010      | Ultrasound       | 8,632       | 2,590 | 6,042       | 58.50 | 58.50           | 31.40  | 30.90              | 8       |
| Kang et al. <sup>74</sup> (2012)         | South Korea | 2010–2010      | Ultrasound       | 633         | 320   | 313         | 53.50 | 52.80           | 60.00  | 47.00              | 8       |
| Mohammadi et al. <sup>54</sup> (2012)    | Iran        | 2012–2012      | Ultrasound       | 335         | 250   | 85          | 46.50 | 44.80           | 55.60  | 54.10              | 8       |
| Thakur et al. <sup>49</sup> (2012)       | India       | 2008–2010      | Ultrasound       | 80          | 40    | 40          | 42.10 | 41.90           | 67.50  | 67.50              | 7       |
| Neri et al. <sup>61</sup> (2011)         | Italy       | 2004–2009      | Ultrasound       | 150         | 90    | 60          | 49.29 | -               | -      | -                  | 7       |
| Agarwal et al. <sup>45</sup> (2011)      | India       | 2010–2010      | Ultrasound       | 124         | 71    | 53          | 57.00 | 61.00           | -      | -                  | 8       |
| Kim et al. <sup>76</sup> (2011)          | South Korea | 2006–2008      | Ultrasound       | 145         | 48    | 97          | 50.30 | 52.00           | 66.70  | 46.40              | 8       |
| Mohammadi et al. <sup>53</sup> (2011)    | Iran        | 2011–2011      | Ultrasound       | 335         | 250   | 85          | 46.58 | 44.85           | 55.60  | 54.10              | 8       |
| Mohammadi et al. <sup>53</sup> (2011)    | Iran        | 2011–2011      | Ultrasound       | 149         | 84    | 65          | 33.71 | 38.38           | 52.40  | 53.80              | 8       |
| Salvi et al. <sup>63</sup> (2010)        | Italy       | 2010–2010      | Ultrasound       | 220         | 92    | 128         | 50.70 | 49.30           | 54.30  | 36.70              | 8       |
| Vlachopoulos et al. <sup>44</sup> (2010) | Greece      | 2006–2008      | Biopsy           | 51          | 23    | 28          | 55.40 | 51.50           | 47.80  | 64.30              | 8       |
| Kiciler et al. <sup>90</sup> (2010)      | Turkey      | 2010–2010      | Biopsy           | 114         | 60    | 54          | 31.70 | 30.30           | 100.00 | 100.00             | 7       |
| Kim et al. <sup>75</sup> (2009)          | South Korea | 2001–2001      | Ultrasound       | 1,021       | 507   | 514         | 52.01 | 51.55           | 62.50  | 46.50              | 8       |
| Ramilli et al. <sup>62</sup> (2009)      | Italy       | 2006–2007      | Ultrasound       | 154         | 90    | 64          | 59.30 | 60.10           | 51.10  | 45.30              | 7       |
| Wang et al. <sup>81</sup> (2009)         | China       | 2010–2016      | Ultrasound       | 169         | 101   | 68          | -     | -               | 51.50  | 41.20              | 7       |

**Supplementary Table 1.** Continue

| Study                                  | Country | Study duration | Diagnosis method | Sample size |       | Age (years) |       | Gender male (%) |       | Quality assessment |         |
|----------------------------------------|---------|----------------|------------------|-------------|-------|-------------|-------|-----------------|-------|--------------------|---------|
|                                        |         |                |                  | Total       | NAFLD | Control     | NAFLD | Control         | NAFLD |                    | Control |
| Fracanzani et al. <sup>58</sup> (2008) | Italy   | 2002–2004      | Ultrasound       | 375         | 125   | 250         | 50.50 | 52.00           | 87.20 | 87.20              | 7       |
| Hamaguchi et al. <sup>67</sup> (2007)  | Japan   | 1998–2004      | Ultrasound       | 1,647       | 312   | 1,335       | 49.10 | 47.80           | 80.10 | 54.70              | 7       |
| Aygun et al. <sup>84</sup> (2008)      | Turkey  | 2005–2006      | Biopsy           | 80          | 40    | 40          | 43.20 | 38.80           | 52.50 | 50.00              | 8       |
| Targher et al. <sup>65</sup> (2006)    | Italy   | 2006–2006      | Ultrasound       | 120         | 60    | 60          | 46.00 | 46.00           | 68.00 | 68.00              | 7       |
| Targher et al. <sup>65</sup> (2006)    | Italy   | 2006–2006      | Ultrasound       | 245         | 85    | 160         | 46.00 | 46.00           | 58.80 | 59.40              | 8       |
| Targher et al. <sup>66</sup> (2005)    | Italy   | 2005–2005      | Ultrasound       | 90          | 50    | 40          | 45.00 | 45.00           | 60.00 | 65.00              | 8       |
| Brea et al. <sup>95</sup> (2005)       | Spain   | 2002–2003      | Ultrasound       | 80          | 40    | 40          | 53.20 | 51.60           | 50.00 | 50.00              | 8       |

NAFLD, non-alcoholic fatty liver disease.
