# Supplementary figures and images for: Non-alcoholic fatty liver disease increases risk of carotid atherosclerosis and ischemic stroke: An updated meta-analysis with 135,602 individuals
Source: PubMed Central journal article supplement — Clin Mol Hepatol. 2022 Mar 2;28(3):483–96. doi: 10.3350/cmh.2021.0406 (PMC9293613; doi:10.3350/cmh.2021.0406), 2022-03-02

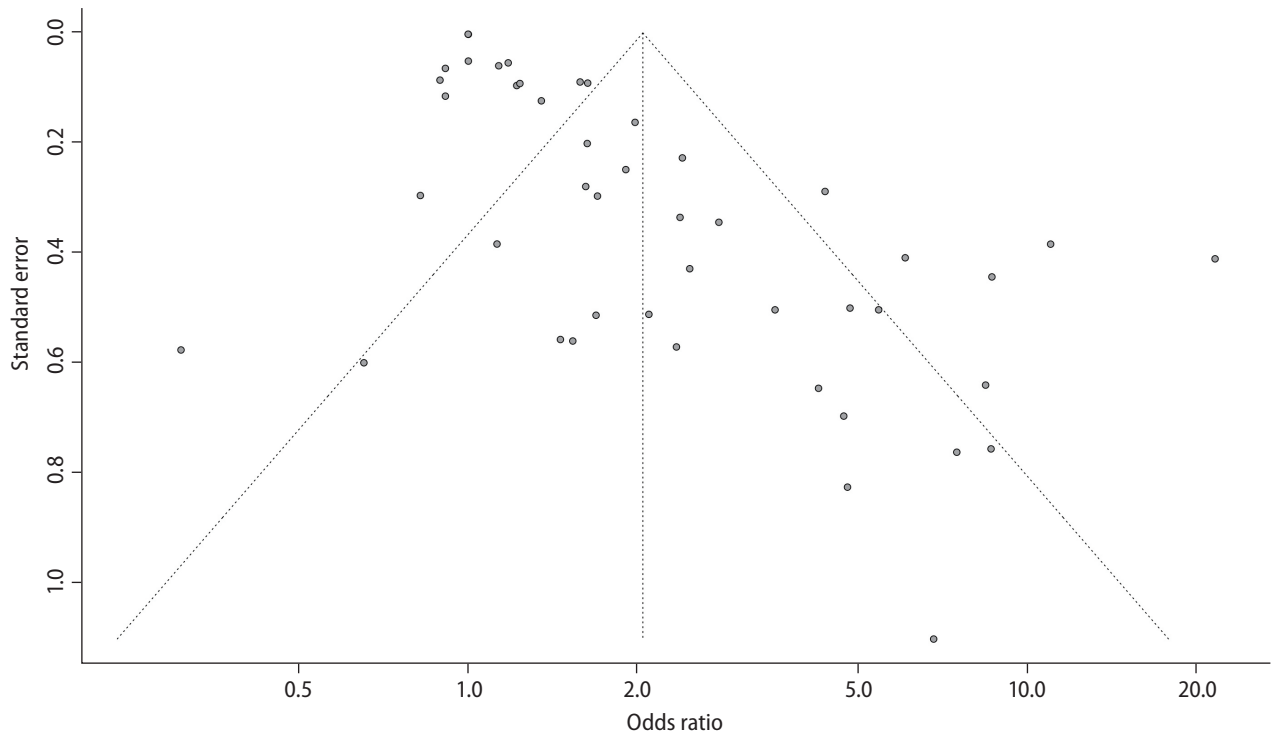

**Supplementary Figure 1.** Funnel plots of publication bias.

Supplement: cmh-2021-0406-suppl3.pdf [file cmh-2021-0406-suppl3.pdf]
